# Supplementary material for: An Analysis of Enzyme Kinetics Data for Mitochondrial DNA Strand Termination by Nucleoside Reverse Transcription Inhibitors
Source: PubMed Central journal article supplement (PMC2603287; doi:10.1371/journal.pcbi.1000261), 2009-01-09
Supplement: pcbi.1000261.s001.pdf [file pcbi.1000261.s001.pdf]

**An Analysis of Enzyme Kinetics Data for Mitochondrial DNA Strand Termination by Nucleoside Reverse Transcriptase Inhibitors**

Katherine V. Wendelsdorf<sup>1</sup>, Zhuo Song<sup>1</sup>, Yang Cao<sup>2</sup> and David C. Samuels<sup>1,3\*</sup>

**1** Virginia Bioinformatics Institute, Virginia Polytechnic Institute and State University, Virginia, USA, **2** Department of Computer Science, Virginia Polytechnic Institute and State University, Virginia, USA, **3** The Center for Human Genetics Research, Department of Molecular Physiology and Biophysics, Vanderbilt University Medical Center, Nashville, Tennessee, USA

**Supplemental Information: Model parameter values.**

TABLE S1. Kinetic parameters  $k_{cat}$  (1/s) for base pairings when previously inserted nucleotide is correct (a Watson-Crick pair).

| <b>Base pairings</b> | <b>T</b> | <b>G</b> | <b>C</b> | <b>A</b> |
|----------------------|----------|----------|----------|----------|
| <b>T</b>             | 25       | 0.08     | 0.1      | 0.0036   |
| <b>G</b>             | 0.012    | 37       | 0.003    | 0.1      |
| <b>C</b>             | 0.16     | 0.066    | 43       | 0.042    |
| <b>A</b>             | 0.013    | 1.16     | 0.038    | 45       |

Values were taken from Lee and Johnson (45) in which the previous base pair is A:T

TABLE S2. Kinetic parameters  $K_m$  ( $\mu$ M) for base pairings when previously inserted nucleotide is correct.

| <b>Base pairings</b> | <b>T</b> | <b>G</b> | <b>C</b> | <b>A</b> |
|----------------------|----------|----------|----------|----------|
| <b>T</b>             | 0.6      | 800      | 540      | 25       |
| <b>G</b>             | 180      | 0.8      | 140      | 160      |
| <b>C</b>             | 200      | 150      | 0.9      | 250      |
| <b>A</b>             | 57       | 70       | 360      | 0.8      |

Values were taken from Lee and Johnson (45) in which the previous base pair is A:T

---

\* David Samuels, Virginia Bioinformatics Institute, Bioinformatics I, Washington Street Blacksburg, VA 24061-0477 Tel: (540) 231-8999, Fax: (540) 231-2606, email: david.samuels@chgr.mc.vanderbilt.edu

mtDNA strand termination by NRTIs

TABLE S3. Estimated  $k_{cat}$  (1/s) kinetic parameters for base pairings when previously inserted nucleotide is a point mutation (a non-Watson-Crick pair).

| <b>Base pairings</b> | <b>T</b> | <b>G</b> | <b>C</b> | <b>A</b> |
|----------------------|----------|----------|----------|----------|
| <b>A</b>             | 0.52     | 0.00052  | 0.00052  | 0.00052  |
| <b>C</b>             | 0.00052  | 0.52     | 0.00052  | 0.00052  |
| <b>G</b>             | 0.00052  | 0.00052  | 0.52     | 0.00052  |
| <b>T</b>             | 0.00052  | 0.00052  | 0.00052  | 0.52     |

The  $k_{cat}$  values for insertion of C onto G measured by Johnson and Johnson (40-41) where the previous base pairing is a non-Watson-Crick base pairing of T:T as opposed to A:T. This value was assumed an approximation of those for other Watson-Crick pairings based on similarities of  $k_{cat}$  values in Table A1 for Watson-Crick base pairings (A:T, C:G). Values for non-Watson-Crick base pairing were made based on the observation from TABLE S1 that  $k_{cat}$  values are approximately 1000 times less for non-Watson-Crick base pairing than for Watson-Crick base pairing.

TABLE S4. Estimated  $K_m$  ( $\mu$ M) kinetic parameters for base pairings when previously inserted nucleotide is a point mutation.

| <b>Base pairings</b> | <b>T</b> | <b>G</b> | <b>C</b> | <b>A</b> |
|----------------------|----------|----------|----------|----------|
| <b>A</b>             | 404      | 40400    | 40400    | 40400    |
| <b>C</b>             | 40400    | 404      | 40400    | 40400    |
| <b>G</b>             | 40400    | 40400    | 404      | 40400    |
| <b>T</b>             | 40400    | 40400    | 40400    | 404      |

The  $K_m$  values for insertion of C onto G measured by Johnson and Johnson (40-41) where the previous base pairing is a non-Watson-Crick base pairing of T:T as opposed to A:T. This value was assumed an approximation of those for other Watson-Crick pairings based on similarities of  $K_m$  values in Table S2 for Watson-Crick base pairings (A:T, C:G). Values for non-Watson-Crick base pairing were made based on the observation from TABLE S2 that  $K_m$  values are approximately 100 times greater for non-Watson-Crick base pairing than for Watson-Crick pairing.

TABLE S5. Exonuclease and Disassociation by polymerase-gamma reaction rates when previous base pair is a Watson-Crick pairing vs. non Watson-Crick.

| <b>Previous base pairs</b>   | <b>Exonuclease rate (1/s)</b> | <b>Disassociation rate (1/s)</b> |
|------------------------------|-------------------------------|----------------------------------|
| <b>Watson-Crick pair</b>     | 0.05                          | 0.02                             |
| <b>Non-Watson-Crick pair</b> | 0.4                           | 0.2                              |

mtDNA strand termination by NRTIs

**Supplemental Information: Other results**

TABLE S6. IC<sub>50</sub> values (μM) for the strand termination on the mtDNA heavy strand. NA – not applicable, meaning that the probability of strand termination never exceeded 50%.

| Analog                       | IC <sub>50</sub> values (μM) |                       |                       |
|------------------------------|------------------------------|-----------------------|-----------------------|
|                              | High dNTP levels             | Medium dNTP levels    | Low dNTP levels       |
| <b>d4T-TP</b>                | 6.75×10 <sup>-4</sup>        | 3.60×10 <sup>-4</sup> | 7.50×10 <sup>-5</sup> |
| <b>ddA-TP</b>                | 5.20×10 <sup>-4</sup>        | 4.00×10 <sup>-4</sup> | 9.80×10 <sup>-5</sup> |
| <b>ddC-TP</b>                | 8.90×10 <sup>-4</sup>        | 5.80×10 <sup>-4</sup> | 1.30×10 <sup>-4</sup> |
| <b>FIAU-TP</b>               | 1.44×10 <sup>-3</sup>        | 8.30×10 <sup>-4</sup> | 1.60×10 <sup>-4</sup> |
| <b>FTC(+)-TP</b>             | 1.40×10 <sup>-2</sup>        | 1.00×10 <sup>-2</sup> | 2.20×10 <sup>-3</sup> |
| <b>acyclovir-TP</b>          | 2.85×10 <sup>-2</sup>        | 1.14×10 <sup>-2</sup> | 1.79×10 <sup>-3</sup> |
| <b>3TC(+)-TP</b>             | 8.8×10 <sup>-2</sup>         | 5.60×10 <sup>-2</sup> | 1.36×10 <sup>-2</sup> |
| <b>ddI-TP</b>                | 0.33                         | 0.23                  | 5.75×10 <sup>-2</sup> |
| <b>3TC(-)-TP</b>             | 1.50                         | 1.00                  | 0.19                  |
| <b>TDF-TP</b>                | 1.45                         | 1.06                  | 0.26                  |
| <b>AZT<sub>2001</sub>-TP</b> | 3.00                         | 1.94                  | 0.37                  |
| <b>AZT<sub>2007</sub>-TP</b> | NA                           | NA                    | 143                   |
| <b>CBV-TP</b>                | NA                           | NA                    | 2.22                  |
| <b>FTC(-)-TP</b>             | NA                           | NA                    | 30.9                  |
